# Supplementary material
Source: PubMed Central journal article supplement (PMC3265660)
Supplement: NIHMS327722-supplement-Supp_Table_S1.pdf [file NIHMS327722-supplement-Supp_Table_S1.pdf]

Supplemental table 1

| gene      | nameFwd  | fwd                      | nameRev  | rev                       | description                                                                                             | median |
|-----------|----------|--------------------------|----------|---------------------------|---------------------------------------------------------------------------------------------------------|--------|
| ACTIN.F   | ACTIN.F  | TCACCCACACTGTGCCATCTACGA | ACTIN.R  | CAGCGGAACCGCTCATTGCCAATGG | ACTIN.F                                                                                                 | 31.32  |
| BACTIN.F  | BACTIN.F | ATTGCCGACAGGATGCAGAA     | BACTIN.R | GCTGATCCACATCTGCTGGAA     | BACTIN.F                                                                                                | 35.43  |
| GAPDH.F   | GAPDH.F  | GAAGGTGAAGTGGGAGTC       | GAPDH.R  | GAAGATGGTATGGGATTTTC      | GAPDH.F                                                                                                 | 35.03  |
| HPRT      | HPRT     | TTCTTGTCAGGACAGTATAATCC  | HPRT     | AGTCTGGCTATATCCAACACTTCG  | HPRT                                                                                                    | 33.21  |
| nm_000029 | 000029f  | ttgagcaatgacgcactc       | 000029r  | ttgtaagctgttggtagactc     | Human angiotensinogen mRNA, complete CDS.                                                               | 31.9   |
| nm_000040 | 000040f  | cagttccctgaagactactg     | 000040r  | acggctgaagttggtctga       | Homo sapiens apolipoprotein C-II (APOC3), mRNA.                                                         | 29.8   |
| nm_000132 | 000132f  | caaaaagtggtgctcaagtg     | 000132r  | ctcttccacatacatgctggt     | Human coagulation factor VIII:C mRNA, complete cds.                                                     | 34.53  |
| nm_000201 | 000201f  | ggctcagcagctacctcta      | 000201r  | gcttgtgttgcggtttcat       | ICAM-1                                                                                                  | 33.92  |
| nm_000295 | 000295f  | tttagagccataccatcgtc     | 000295r  | ccacttttccatgaagagg       | Human alpha-1-antitrypsin mRNA, complete cds.                                                           | 27.26  |
| nm_000359 | 000359f  | ttgaggcaatgaacacagtg     | 000359r  | ggagagctgtgggtctgc        | Homo sapiens transglutaminase 1 (TGM1), mRNA.                                                           | 31.96  |
| nm_000417 | 000417f  | agtgagacttctcctcgtc      | 000417r  | cctgtactctgtttaaattgga    | Human interleukin-2 receptor mRNA (short form), complete cds.                                           | 32.97  |
| nm_000450 | 000450f  | ctcgtctactactgtgaagc     | 000450r  | aagccagagagaaatggtg       | Human endothelial leukocyte adhesion molecule 1 (ELAM-1) mRNA, complete cds.                            | 32.67  |
| nm_000546 | 000546f  | atctactggagcgaacacgc     | 000546r  | cccttcttggagagattc        | Human p53 cellular tumor antigen mRNA, complete cds.                                                    | 40     |
| nm_000572 | 000572f  | aggttccagagaagcagtc      | 000572r  | tcagtttctgtctcattgca      | Human interleukin 10 (IL10) gene, complete cds.                                                         | 32.4   |
| nm_000575 | 000575f  | agttcccatcaaatctgtc      | 000575r  | acgcctgttttccatgctc       | Human gene for interleukin 1 alpha (IL-1 alpha).                                                        | 40     |
| nm_000576 | 000576f  | ctggagagtgatgatccaaa     | 000576r  | actggcagactcaaatcc        | Human interleukin 1-beta (IL1B) mRNA, complete cds.                                                     | 35.83  |
| nm_000577 | 000577f  | ctgactgagcgaagaaca       | 000577r  | aggcgcagactcaaaact        | Homo sapiens interleukin 1 receptor antagonist (IL1RN), mRNA.                                           | 32.08  |
| nm_000579 | 000579f  | tcttctccaaaagcacttg      | 000579r  | cagttgatcgggtgtaact       | Human CC chemokine receptor 5 mRNA, complete cds.                                                       | 35.76  |
| nm_000584 | 000584f  | tgqccaacacagaattat       | 000584r  | acttcccaacccctctgc        | Human interleukin 8 (IL8) gene, complete cds.                                                           | 39.91  |
| nm_000585 | 000585f  | tcgaacacatttgaagaat      | 000585r  | gaagacatgaatcggactc       | IL15                                                                                                    | 33.4   |
| nm_000586 | 000586f  | ttcatgtgtaatgctgatga     | 000586r  | tcagtttgaatgactgcttg      | Human interleukin 2 (IL2) mRNA, complete cds.                                                           | 38.28  |
| nm_000590 | 000590f  | aacagcctcaacaaacac       | 000590r  | tcttgcctcatcctctc         | Human IL9 protein gene, complete cds.                                                                   | 40     |
| nm_000593 | 000593f  | ctctctgacagaagcctga      | 000593r  | ccagaagaagagatgtgca       | Homo sapiens peptide transporter (TAP1) mRNA, complete cds.                                             | 35.03  |
| nm_000594 | 000594f  | accctctctgcatcaactc      | 000594r  | ggaagacccctccagata        | Human mRNA for tumor necrosis factor.                                                                   | 34.28  |
| nm_000595 | 000595f  | tgagttccagctctctctc      | 000595r  | ctgtgtatcagctgagcag       | Human mRNA for lymphotoxin (TNF-beta), complete cds.                                                    | 35.97  |
| nm_000596 | 000596f  | ggccaactcacaagaat        | 000596r  | ttccatccaaggttagac        | Homo sapiens insulin-like growth factor binding protein 1 (IGFBP1), mRNA.                               | 31.91  |
| nm_000597 | 000597f  | tggtgtgtaacccaacac       | 000597r  | agcctctgctctcatt          | Homo sapiens insulin-like growth factor binding protein 2 (IGFBP2), mRNA.                               | 36.69  |
| nm_000600 | 000600f  | agtgaggacaagccagagc      | 000600r  | gttgggtcaggagtggtta       | Human interleukin 6 mRNA, complete cds.                                                                 | 24.29  |
| nm_000619 | 000619f  | atgtccaacgcaagaacata     | 000619r  | tcgaacagactgactacc        | Human immune interferon (IFN-gamma) gene, complete cds.                                                 | 40     |
| nm_000620 | 000620f  | atgtcctaaagccatcca       | 000620r  | cctcatggtatcgtgtgca       | nos                                                                                                     | 30.58  |
| nm_000639 | 000639f  | atgagggagaagatgatga      | 000639r  | tcagcactgtaagattgaaca     | Human mRNA for Fas ligand, complete cds.                                                                | 22.99  |
| nm_000641 | 000641f  | ctccaggtgtgctgaca        | 000641r  | ggctcagggtcttcagg         | Human interleukin 11 mRNA, complete cds.                                                                | 25.51  |
| nm_000710 | 000710f  | gtggttgcctctgcttc        | 000710r  | atgaagcttcccaaaagca       | Homo sapiens bradykinin receptor B1 (BDKRB1), mRNA.                                                     | 40     |
| nm_000757 | 000757f  | agacgaagaagagaccaca      | 000757r  | ctctcatgctctgtcagct       | Human macrophage-specific colony-stimulating factor (CSF-1) mRNA, complete cds.                         | 34.73  |
| nm_000758 | 000758f  | ttcctgtgcaaccagagata     | 000758r  | ggctccagcagctcaag         | Homo sapiens colony stimulating factor 2 (granulocyte-macrophage) (CSF2), mRNA.                         | 32     |
| nm_000759 | 000759f  | gtgctctgcttctcaag        | 000759r  | ggcaaggtggcctagaac        | Homo sapiens colony stimulating factor 3 (granulocyte) (CSF3), mRNA.                                    | 24.8   |
| nm_000818 | 000818f  | ttgggagacaaggtcaattc     | 000818r  | tgccaagggcttctattct       | Human glutamate decarboxylase (GAD65) mRNA, complete cds.                                               | 40     |
| nm_000852 | 000852f  | ggccaaggtgactatgtga      | 000852r  | ggctcccaaatgaagctc        | Homo sapiens glutathione S-transferase pi (GSTP1), mRNA.                                                | 35.35  |
| nm_000927 | 000927f  | cagaatggcagagctcaaga     | 000927r  | actggcctgtttccagc         | Human sapiens P-glycoprotein (mdr1) mRNA, complete cds.                                                 | 38.34  |
| nm_000952 | 000952f  | aagcactctaccgaaagt       | 000952r  | gatctgttgaagggcaaca       | pafr1                                                                                                   | 33.37  |
| nm_000961 | 000961f  | gggaacagcctgagaatta      | 000961r  | accagcacaaggaacacaaa      | Human mRNA for prostacyclin synthase, complete cds.                                                     | 25.94  |
| nm_000963 | 000963f  | ttggtgagaagtggtttt       | 000963r  | tgatctggaactgaatga        | Homo sapiens cyclooxygenase-2 (Cox-2) mRNA, complete cds.                                               | 34.97  |
| nm_001065 | 001065f  | lgttttgggaaatcgacac      | 001065r  | tgaaagcctggagtgagct       | H.sapiens TNF-R mRNA for tumor necrosis factor receptor type 1.                                         | 33.1   |
| nm_001078 | 001078f  | tcgtctcttatttctgctc      | 001078r  | tctcaagactatagcccctca     | Human mRNA for vascular cell adhesion molecule 1 (VCAM-1).                                              | 27.11  |
| nm_001170 | 001170f  | aaccaagaagcggaaag        | 001170r  | accaaaactctcatctgga       | Human complement factor B mRNA, complete cds.                                                           | 40     |
| nm_001758 | 001758f  | lgttactactcgcctcaca      | 001758r  | caggcttctgatctctc         | Human cyclin D (cyclin D1) mRNA, complete cds.                                                          | 40     |
| nm_001760 | 001760f  | atttctgaccagctctctc      | 001760r  | cggtacatgccaaggtgat       | Human D3-type cyclin (CDN3) mRNA, complete cds.                                                         | 37.46  |
| nm_001778 | 001778f  | gcacgtctgctcctgctc       | 001778r  | agtaacagcggcaaatggtg      | Human pan-leukocyte antigen (CD48) mRNA, complete cds.                                                  | 31.12  |
| nm_001781 | 001781f  | cttcttaaaaagatcagcag     | 001781r  | ttcttgcattgaccact         | CD69 cds                                                                                                | 40     |
| nm_002002 | 002002f  | ctgtcagctcaccacgc        | 002002r  | cccttcaggccaagctc         | Homo sapiens Fc fragment of IgE, low affinity II, receptor for (CD23A) (FCER2), mRNA.                   | 31.81  |
| nm_002127 | 002127f  | gttcttccctgcccaccat      | 002127r  | tttcttccagcagcagc         | Human lymphocyte antigen (HLA-G1) mRNA, complete cds.                                                   | 40     |
| nm_002133 | 002133f  | agcttcttggaggttgcag      | 002133r  | gaacttgcactttgtctgc       | Homo sapiens heme oxygenase (decycling) 1 (HMOX1), mRNA.                                                | 31.88  |
| nm_002160 | 002160f  | caccaactgtctctgctc       | 002160r  | acgcctgactgtggtatt        | H.sapiens mRNA for tenascin-C, 7560bp.                                                                  | 25.28  |
| nm_002176 | 002176f  | aaaactggagaagaagttcac    | 002176r  | actccttgcctcaggtaa        | Human interferon-beta mRNA, complete cds.                                                               | 33.1   |
| nm_002187 | 002187f  | cttccaggacaagcctcag      | 002187r  | ccactcgtccaagatgag        | Homo sapiens interleukin 12, p40 mRNA, complete cds.                                                    | 36.43  |
| nm_002198 | 002198f  | aaacaacgtgagtggaag       | 002198r  | ctggctctcaattcttg         | Homo sapiens interferon regulatory factor 1 (IRF1), mRNA.                                               | 29.16  |
| nm_002199 | 002199f  | tcaccatacaagcagagac      | 002199r  | ctgggtcatggagaagc         | Human mRNA for interferon regulatory factor-2 (IRF-2).                                                  | 13.22  |
| nm_002229 | 002229f  | aaggagaacccagagacc       | 002229r  | ctccacttggatgcctct        | Human jun-B mRNA for JUN-B protein.                                                                     | 40     |
| nm_002292 | 002292f  | ggcaaggcagaacaact        | 002292r  | cctcataggtcctccaat        | H.sapiens LAMB2 mRNA for beta2 laminin.                                                                 | 30     |
| nm_002421 | 002421f  | lgttcttccagaaactgtga     | 002421r  | catcatactccagatattgtagc   | Homo sapiens matrix metalloproteinase 1 (interstitial collagenase) (MMP1), mRNA.                        | 28     |
| nm_002422 | 002422f  | aggtcttccagcaaacatg      | 002422r  | cagtaagaataaagaacccaaa    | mmp-3                                                                                                   | 40     |
| nm_002448 | 002448f  | gagttctcagctcctc         | 002448r  | cttccagctctcctct          | msx-1                                                                                                   | 40     |
| nm_002502 | 002502f  | ctgacatggcctgagagag      | 002502r  | acgaactgtcttctccacc       | Homo sapiens NFkappa light polypeptide gene enhancer in B-cells 2 (p49/p100) (NFKB2), mRNA.             | 28.28  |
| nm_002543 | 002543f  | cccagacataccctcaggt      | 002543r  | ttgcttcttctgacatatacta    | lox-1                                                                                                   | 39.3   |
| nm_002608 | 002608f  | gttctcagactctgctga       | 002608r  | gttggctggtctatgagg        | pdgf-b                                                                                                  | 25.56  |
| nm_002800 | 002800f  | tgacatctcatgttagctg      | 002800r  | ggcaaaaggtctcagat         | Human proteasome-related (LMP-2) mRNA, complete cds.                                                    | 34.02  |
| nm_002908 | 002908f  | tgactttgaggatctgact      | 002908r  | tcttgaacaacacagactgtt     | Homo sapiens v-rel avian reticuloendotheliosis viral oncogene homolog (REL), mRNA.                      | 27.07  |
| nm_002982 | 002982f  | gttctccaagaagcgttga      | 002982r  | gtttgcttgcaggtggt         | mcp-1                                                                                                   | 36.5   |
| nm_002985 | 002985f  | ctctctgcttctcctcaat      | 002985r  | aaagacagctctgggttg        | Human T cell-specific protein (RANTES) mRNA, complete cds.                                              | 34.06  |
| nm_003005 | 003005f  | ctcaactcgtgccaacc        | 003005r  | gtcccaccattacagacc        | Homo sapiens selectin P (granule membrane protein 140kD, antigen CD62) (SELP), mRNA.                    | 25.39  |
| nm_003247 | 003247f  | cttatctatgacaaactcagc    | 003247r  | tctctcattgctacttgagg      | Human thrombospondin 2 (THBS2) mRNA, complete cds.                                                      | 40     |
| nm_003360 | 003360f  | aagcatagcagcttaagtga     | 003360r  | tcattcacttctttatgctt      | Homo sapiens UDP glycosyltransferase 8 (UDP-galactose ceramide galactosyltransferase) (UGT8), mRNA.     | 36.87  |
| nm_003380 | 003380f  | ccctctggtgataccactc      | 003380r  | ctgtatgctgagaatttcg       | Human vimentin gene, complete cds.                                                                      | 40     |
| nm_003998 | 003998f  | gagacatcttccgcaaac       | 003998r  | gtcttcttcccaataca         | Homo sapiens nuclear factor of kappa light polypeptide gene enhancer in B-cells 1 (p105) (NFKB1), mRNA. | 37.31  |
| nm_004049 | 004049f  | gctgggaaaatgctttgta      | 004049r  | ttgctcaggagagatgactt      | Homo sapiens BCL2-related protein A1 (BCL2A1), mRNA.                                                    | 37.68  |
| nm_004887 | 004887f  | ctgtaagaagctggaatga      | 004887r  | agtctctgactcctgcta        | Homo sapiens chemokine MIP-2 gamma (MIP-2 gamma) mRNA, complete cds.                                    | 28.33  |
| nm_004994 | 004994f  | gaagtgaccagatgttc        | 004994r  | ctcagccagctagaag          | Homo sapiens matrix metalloproteinase 9 (MMP9), mRNA.                                                   | 22.14  |
| nm_005191 | 005191f  | ttttgtatgtcgtctgac       | 005191r  | agggctacatttctcttc        | Homo sapiens CD80 antigen (CD28 antigen ligand 1, B7-1 antigen) (CD80), mRNA.                           | 38.11  |
| nm_005375 | 005375f  | ttcttctgctacacactg       | 005375r  | gccatlaaaagcagctgtg       | Homo sapiens v-myb myeloblastosis viral oncogene homolog (avian) (MYB), mRNA.                           | 24.37  |
| nm_005429 | 005429f  | gttccaccacaacatgc        | 005429r  | gaaggacacaacagcacac       | vegf-c                                                                                                  | 32.94  |
| nm_006211 | 006211f  | ggaagatgaagcagaagc       | 006211r  | aaactccatcgtttctgg        | Homo sapiens proenkephalin (PENK), mRNA.                                                                | 34.04  |
| nm_007164 | 007164f  | caecgctctctctctc         | 007164r  | gctctctctctctctc          | Human mucosal addressin cell adhesion molecule-1 (MAdCAM-1) mRNA, complete cds.                         | 33.05  |
| nm_020529 | 020529f  | tgccagagagtgaggatgag     | 020529r  | gcttccaaacacagactat       | mad-3                                                                                                   | 27.93  |
| nm_138578 | 138578f  | gaactcttggagacaatgcag    | 138578r  | agttagcaccagcagaacc       | H.sapiens bcl-xL mRNA.                                                                                  | 35.58  |
